# Supplementary material
Source: PubMed Central journal article supplement (PMC3288487)
Supplement: NIHMS350163-supplement-2.pdf [file NIHMS350163-supplement-2.pdf]

## Supp Fig. 2

### GAG peptide pool ICS Data

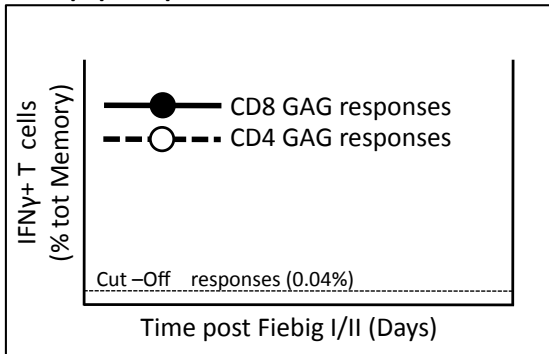

### Single peptide Elispot Data

| Time    | Days post Fiebig I/II     |
|---------|---------------------------|
| Protein | SFU/10 <sup>6</sup> cells |

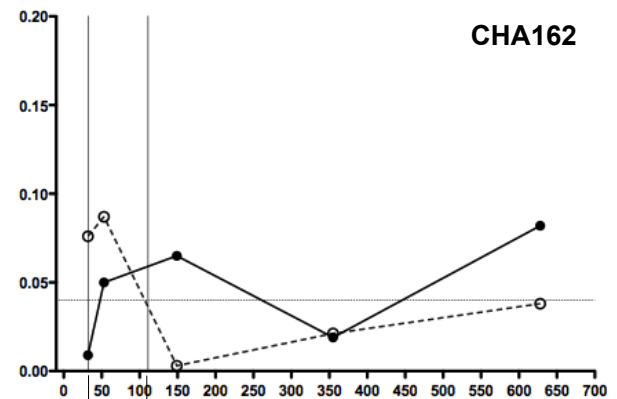

| Time | 32  | 111  |
|------|-----|------|
| NEF  | 140 | 683  |
| VIF  | 0   | 1000 |
| ENV  | nd  | nd   |
| GAG  | 0   | 60   |

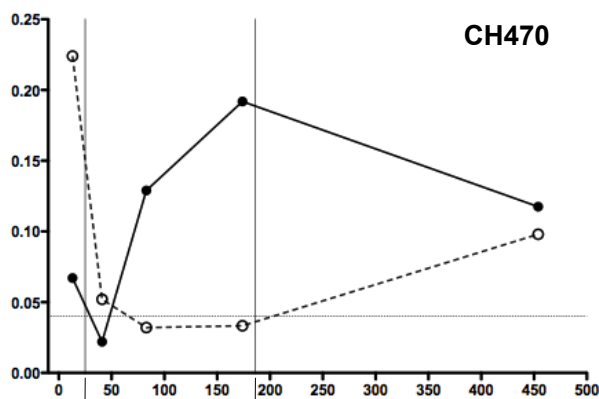

| Time | 25  | 186 |
|------|-----|-----|
| NEF  | 118 | 50  |
| POL  | 148 | 263 |
| ENV  | 0   | 193 |
| GAG  | 63  | 937 |

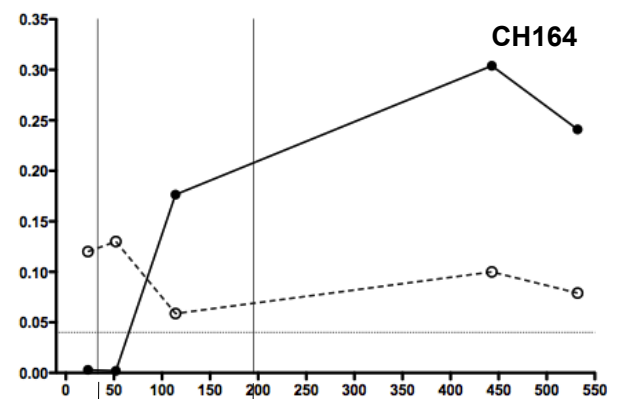

| Time | 33   | 195 |
|------|------|-----|
| NEF  | 1373 | 980 |
| POL  | 0    | 67  |
| ENV  | 0    | 987 |
| GAG  | 0    | 63  |

### Supplementary Figure 2: ELISPOT responses towards Nef, Pol, Env and Gag single peptide overlaid with ICS data (n=3).

A schematic representing how the data are displayed is depicted on the upper left corner. Briefly, Flow cytometry data measuring the expression of IFN $\gamma$ + cell in Total memory CD4+ and CD8+ T cells in responses to Gag pool are presented on the graph. Black dots correspond to CD8+ T cell responses and open dots correspond to CD4+ T cell responses. Values obtained using Elispot assay in response to Nef, Pol, Env and Gag single peptides are presented below each graph. The time of measurement in indicated on top. Positive responses were defined as  $\geq 50$  SFU/ million,  $>4\times$  background. For all assays, six negative control wells (media only) and at least 1 positive control well (10  $\mu\text{g/ml}$  PHA) were used.
